# Supplementary material for: Aggregation-induced emission enhancement and cell imaging of a novel (carbazol-N-yl)triphenylamine–BODIPY
Source: Royal Society of Chemistry journal article supplement (doi:10.1039/c6nj01495j), 2016-01-01
Supplement: c6nj01495j1.pdf [file c6nj01495j1.pdf]

Electronic Supplementary Material (ESI) for New Journal of Chemistry.

***Electronic supplementary information(ESI)***

**Aggregation-Induced Emission Enhancement and cell imaging of a novel  
(carbazol-N-yl )triphenylamine-BODIPY**

Qian Li and Ying Qian \*

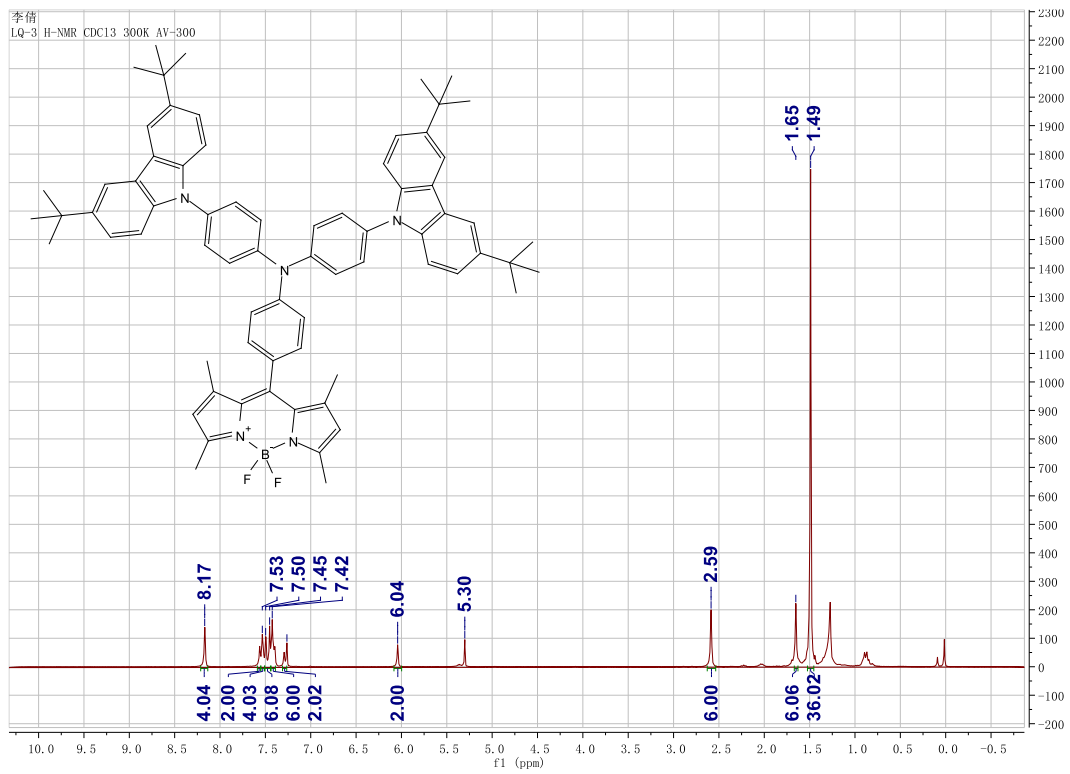

Fig. S1  $^1\text{H}$  NMR spectra of BCPA-BODIPY in  $\text{CDCl}_3$

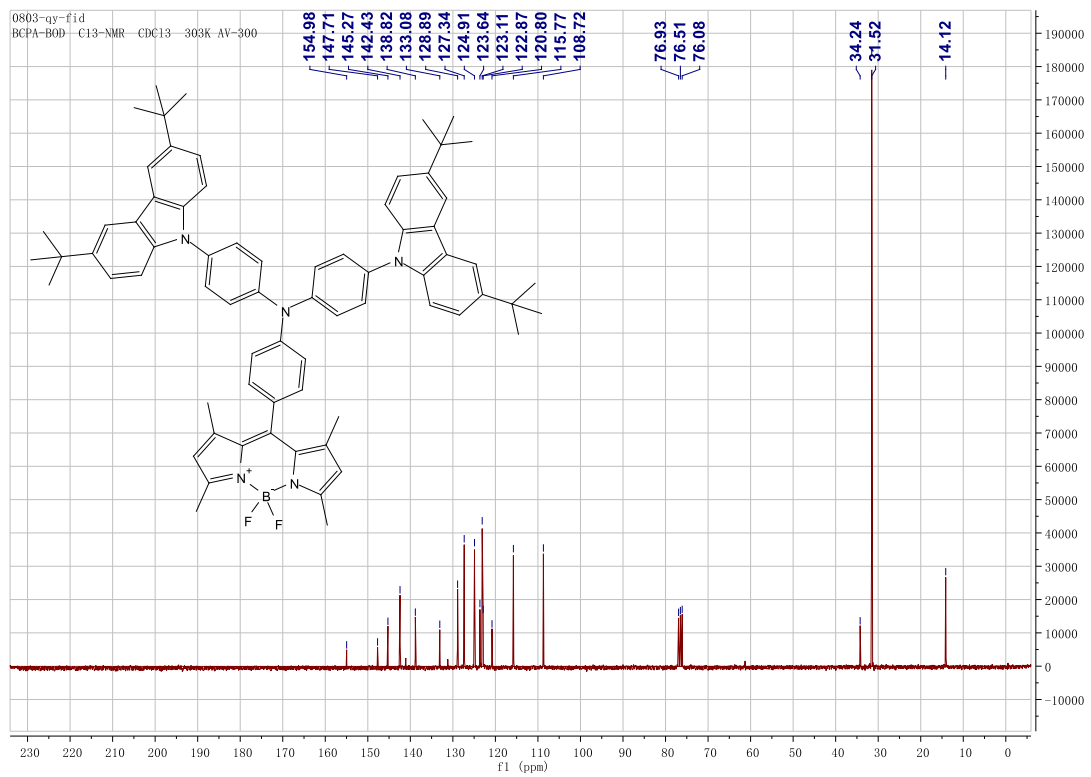

Fig. S2  $^{13}\text{C}$  NMR spectra of BCPA-BODIPY in  $\text{CDCl}_3$

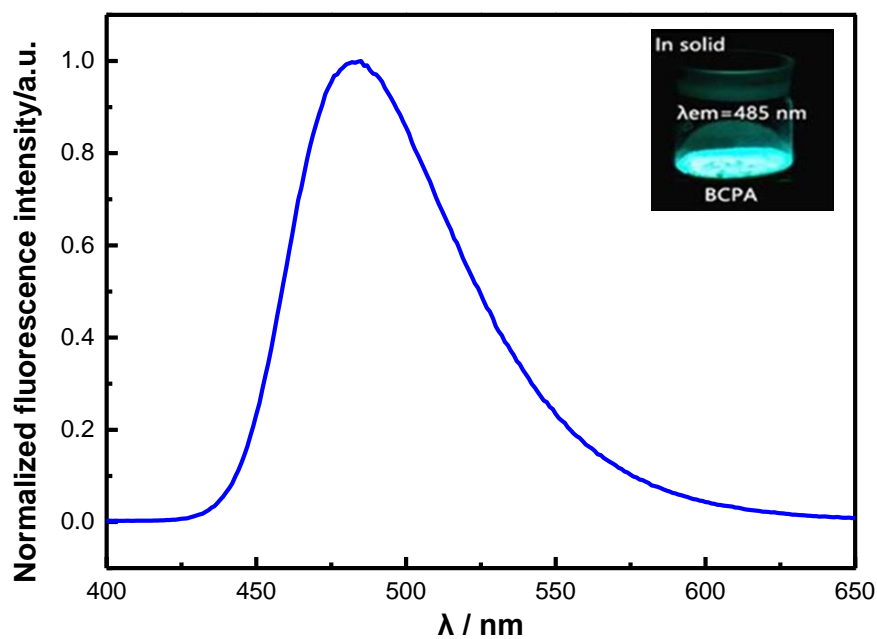

Fig. S3 The fluorescence spectra of BCPA in solid state; the inset presents the fluorescence photograph of its solid powder excited at 365 nm

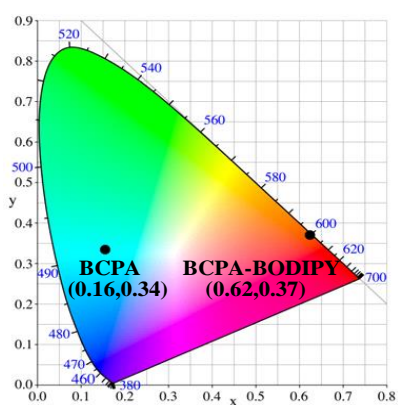

Fig.S4 CIE chromaticity coordinates of BCPA-BODIPY and BCPA

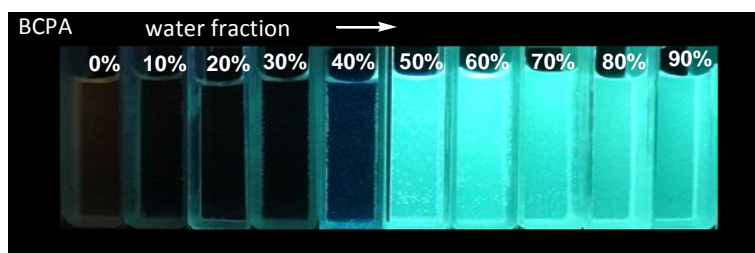

Fig.S5 The fluorescence photographs under UV light of BCPA in mixed solvent of water and THF system with different water fractions.

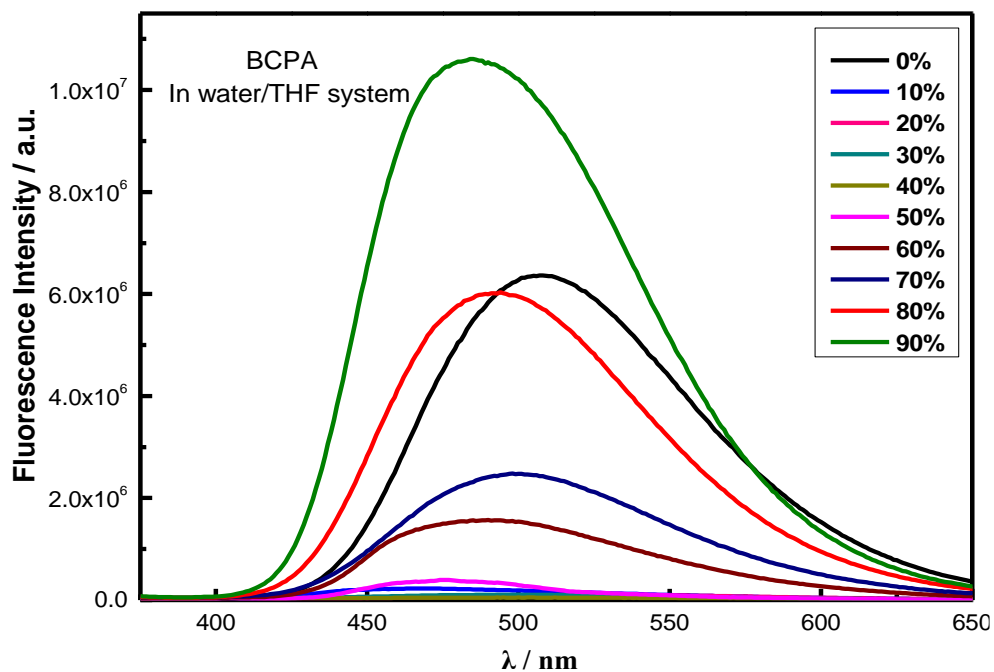

**Fig.S6** Fluorescence emission spectra of  $10^{-5}$  M BCPA in the mixed solvent of water and THF system with different water fractions;

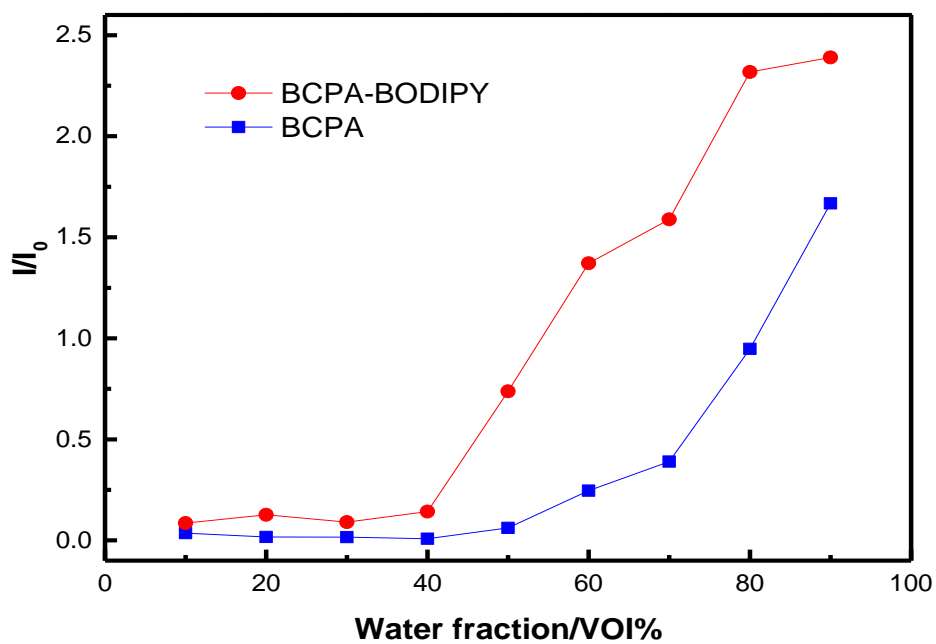

**Fig.S7** Corresponding changes in PL peak intensities of BCPA-BODIPY (>600 nm) and BCPA in the mixed solvent of water and THF system with different water fractions ( $I/I_0$ ,  $I_0$  = PL intensity in pure THF solution)

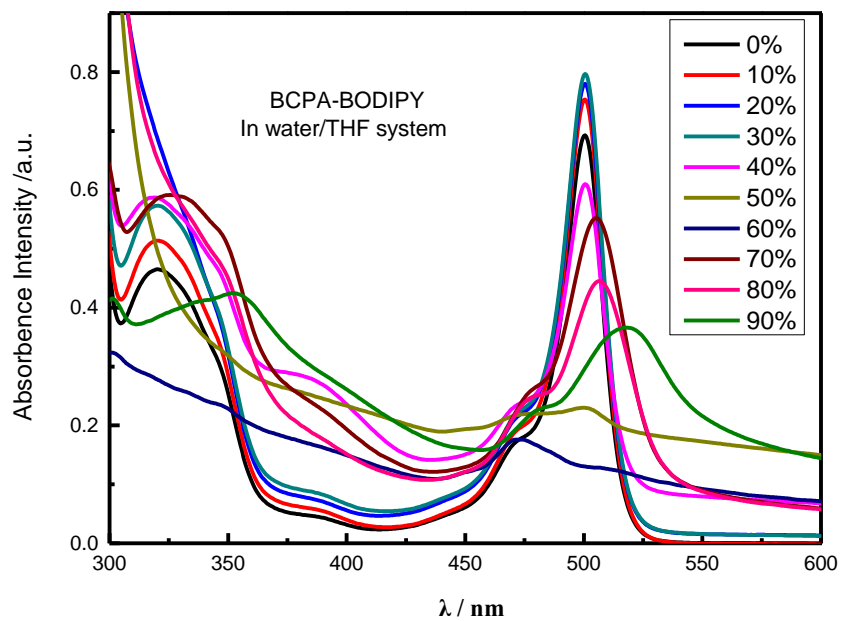

**Fig. S8** UV-vis absorbance spectra of BCPA-BODIPY in THF ( $10^{-5}$  mol·L $^{-1}$ ) with different water fractions
